# Supplementary material
Source: PubMed Central journal article supplement (PMC7921720)
Supplement: mmc1.pdf [file mmc1.pdf]

# Recommended Approaches to Minimize Aerosol Dispersion of SARS-CoV-2 During Noninvasive Ventilatory Support Can Cause Ventilator Performance Deterioration

## A Benchmark Comparative Study

*Maxime Patout, MD, PhD; Emeline Fresnel, PhD; Manuel Lujan, MD, PhD; Claudio Rabec, MD; Annalisa Carlucci, MD, PhD; Léa Razakamanantsoa, MD; Adrien Kerfourn, PhD; Hilario Nunes, MD, PhD; Yacine Tandjaoui-Lambiotte, MD; Antoine Cuvelier, MD, PhD; Jean-François Muir, MD, PhD; Cristina Lalmoda, MD; Bruno Langevin, MD; Javier Sayas, MD, PhD; Jesus Gonzalez-Bermejo, MD, PhD; and Jean-Paul Janssens, MD; on behalf of the SomnoNIV Group*

CHEST 2021; 160(1):175-186

*Online supplements are not copyedited prior to posting and the author(s) take full responsibility for the accuracy of all data.*

**e-Figure 1:** 3D-printed head model with setup 4 test.

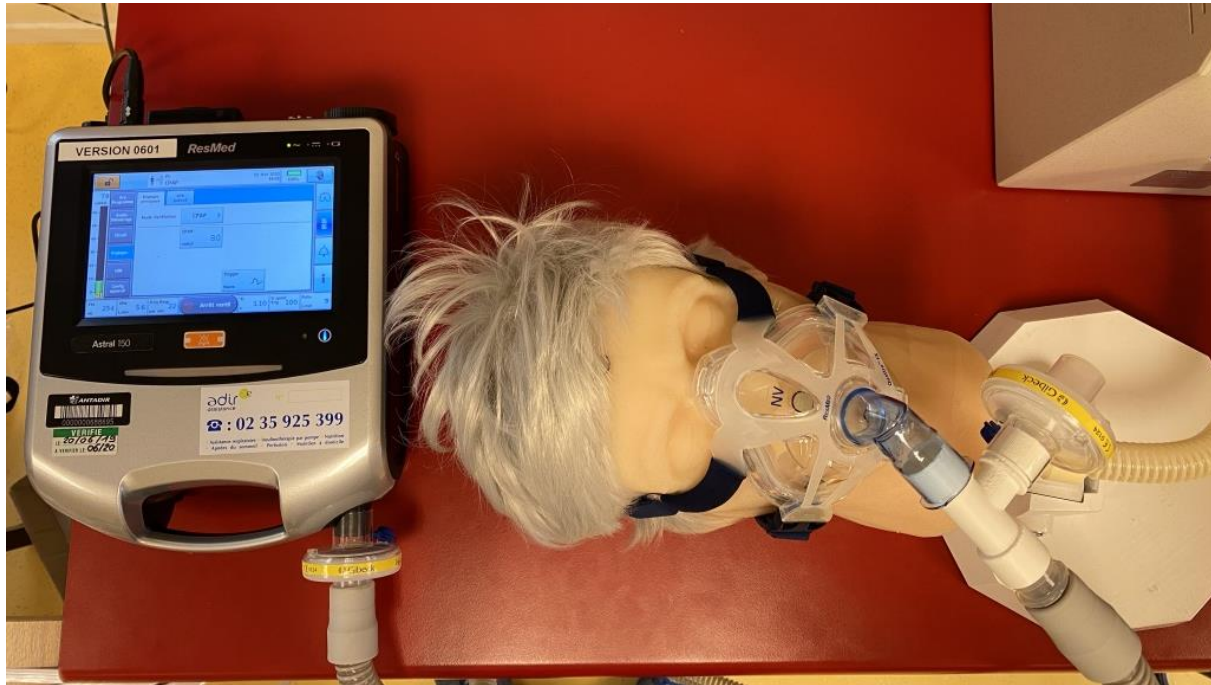

**e-Figure 2:** 3-D model of the connector used in setup 4.

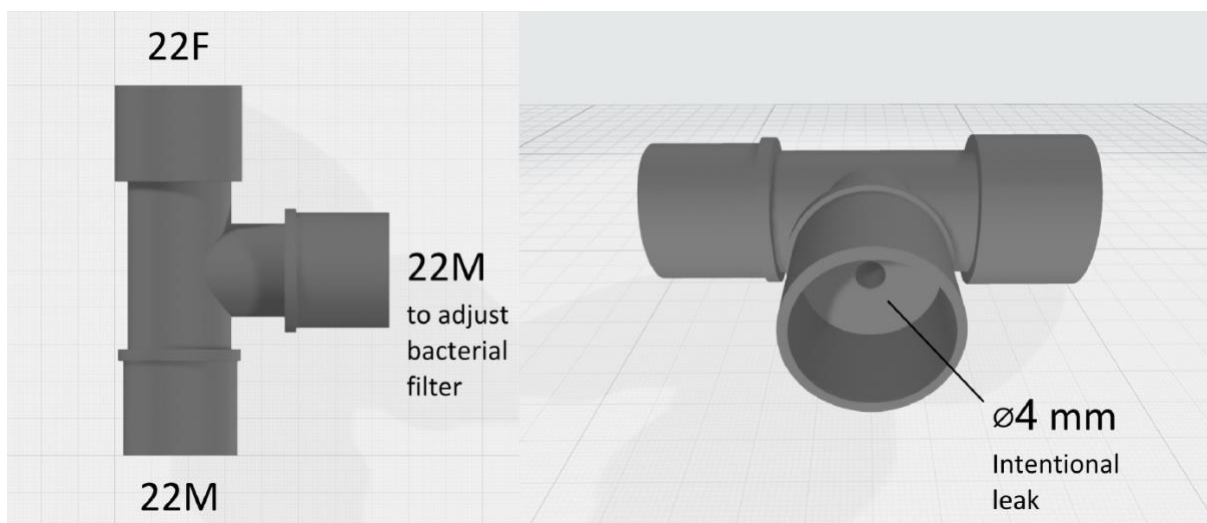

**e-Figure 3:** Simulated assisted breathing cycle with ASL 5000 (airway pressure, patient flow and muscular pressure). Point (b) is indicative of the sensitivity of the trigger, while keeping in mind that this value is affected, on one hand, by the intensity of the inspiratory effort and, on the other hand, by the characteristics of the patient-ventilator interface, such as the length of the circuit, its compliance, the presence of a humidifier or the type of mask. In our case, the inspiratory effort and the ventilatory settings are the same in all simulations. Therefore, the only variable for which we assessed the impact on ventilator performances is the circuit setup.

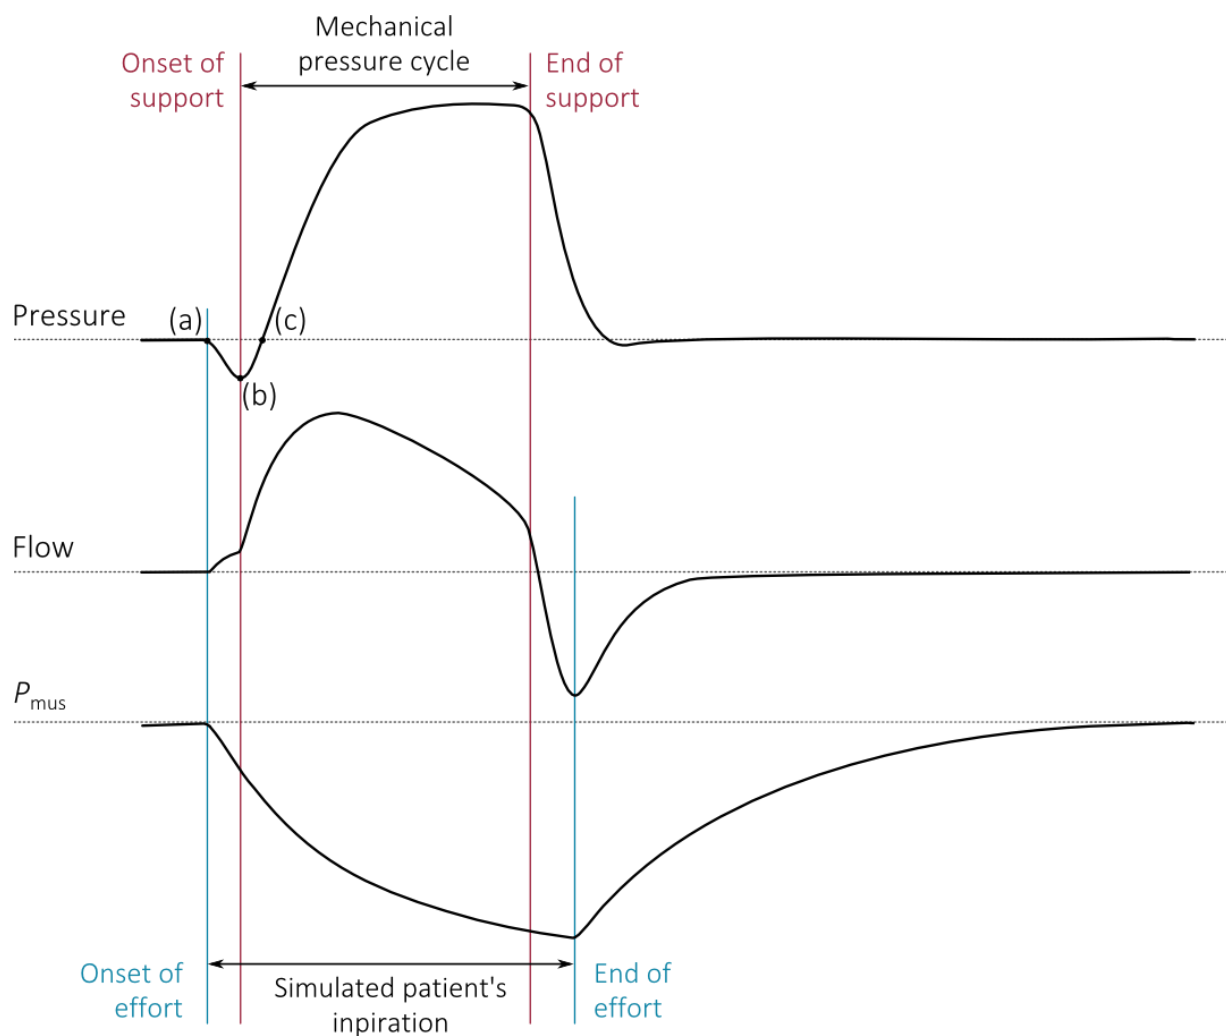

**Experimental model: Circuit setups:**

The dead space between the mask and the exhalation valve was\*:

- Setup 1: 1 filter + 1 elbow connector (ResMed)  $\approx$  65 ml
- Setup 2: 1 filter + 1 Whisper Swivel II (Respironics)  $\approx$  75 ml
- Setup 3: 1 T connector (Intersurgical) + 1 filter + 1 Whisper Swivel II  $\approx$  105 ml
- Setup 4: 1 3D connector (Phoenix effect)  $\approx$  25 ml (3-D printed connector available here: <http://www.kernelbiomedical.com/3dleak>) (efigure 5)
- Setup 6: 1 T connector + 1 expiratory valve (Intersurgical)  $\approx$  45 ml
- Setup 7: 1 filter + 1 expiratory valve (Intersurgical)  $\approx$  75 ml

For setups 5 and 8, there was no additional dead space given the dual limb circuit.

\* an average volume of 50 ml was used for the filter dead space

**e-Table 1:** Proportion of synchronized and asynchronized cycles during non-invasive ventilation without the use of any filter or with the use of low resistance filter (Low filter) and with heat and moisture exchange (HME). Results reported as percentage of cycles (p:0.3240)

|                     | <b>No filter</b> | <b>Low filter</b> | <b>HME</b> |
|---------------------|------------------|-------------------|------------|
| Ineffective efforts | 1.7              | 2.5               | 2.8        |
| Auto-triggering     | 0.0              | 1.4               | 1.7        |
| Double triggering   | 0.0              | 0.0               | 0.0        |
| Early cycling       | 1.1              | 0.0               | 0.0        |
| Late cycling        | 0.0              | 5.0               | 3.3        |
| Synchronized cycles | 97.2             | 91.1              | 92.2       |

**e-Table 2:** Proportion of synchronized and asynchronized cycles during non-invasive ventilation with the different type of circuit setups. Results reported as percentage of cycles (p<0.0001)

|                     | <b>Setup 1</b> | <b>Setup 2</b> | <b>Setup 3</b> | <b>Setup 4</b> | <b>Setup 5</b> | <b>Setup 6</b> | <b>Setup 7</b> | <b>Setup 8</b> |
|---------------------|----------------|----------------|----------------|----------------|----------------|----------------|----------------|----------------|
| Ineffective efforts | 0.0            | 0.0            | 0.0            | 0.0            | 0.0            | 5.9            | 0.0            | 12.6           |
| Auto-triggering     | 1.5            | 1.5            | 0.0            | 0.0            | 1.5            | 0.7            | 1.5            | 1.5            |
| Double triggering   | 0.0            | 0.0            | 0.0            | 0.0            | 0.0            | 0.0            | 0.0            | 0.0            |
| Early cycling       | 0.0            | 0.0            | 0.0            | 0.0            | 0.0            | 0.0            | 0.0            | 3.0            |
| Late cycling        | 0.0            | 3.0            | 0.0            | 0.0            | 0.0            | 0.7            | 0.0            | 18.5           |
| Synchronized cycles | 98.5           | 95.6           | 100.0          | 100.0          | 98.5           | 92.6           | 98.5           | 64.4           |
